# Supplementary material for: Biological Activity, Lipophilicity and Cytotoxicity of Novel 3-Acetyl-2,5-disubstituted-1,3,4-oxadiazolines
Source: MDPI journal article supplement (doi:10.3390/ijms222413669), 2021-12-20
Supplement: s1 [file s1]

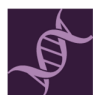

Supplementary Materials

# Biological Activity, Lipophilicity and Cytotoxicity of Novel 3-Acetyl-2,5-disubstituted-1,3,4-oxadiazolines

Kinga Paruch <sup>1,\*</sup>, Anna Biernasiuk <sup>2</sup>, Anna Berecka-Rycerz <sup>3</sup>, Anna Hordyjewska <sup>4</sup> and Łukasz Popiołek <sup>1</sup>

<sup>1</sup> Chair and Department of Organic Chemistry, Faculty of Pharmacy, Medical University of Lublin, 4A Chodźki Street, 20-093 Lublin, Poland; lukasz.popiolek@umlub.pl

<sup>2</sup> Chair and Department of Pharmaceutical Microbiology, Faculty of Pharmacy, Medical University of Lublin, 1 Chodźki Street, 20-093 Lublin, Poland; anna.biernasiuk@umlub.pl

<sup>3</sup> Chair and Department of Medicinal Chemistry, Faculty of Pharmacy, Medical University of Lublin, 4 Jaczewskiego Street, 20-093 Lublin, Poland; anna.berecka@umlub.pl

<sup>4</sup> Chair and Department of Medicinal Chemistry, Faculty of Medical Sciences, Medical University of Lublin, 4A Chodźki Street, 20-093 Lublin, Poland; anna.hordyjewska@umlub.pl

\* Correspondence: kinga.paruch@umlub.pl

## Microbiology - *In vitro* Antimicrobial Assay Results

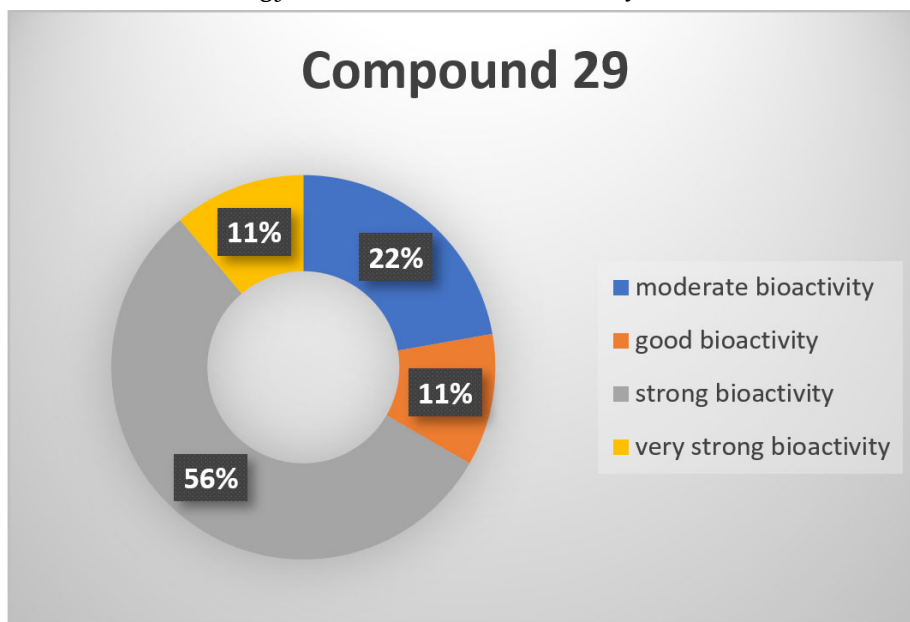

(a)

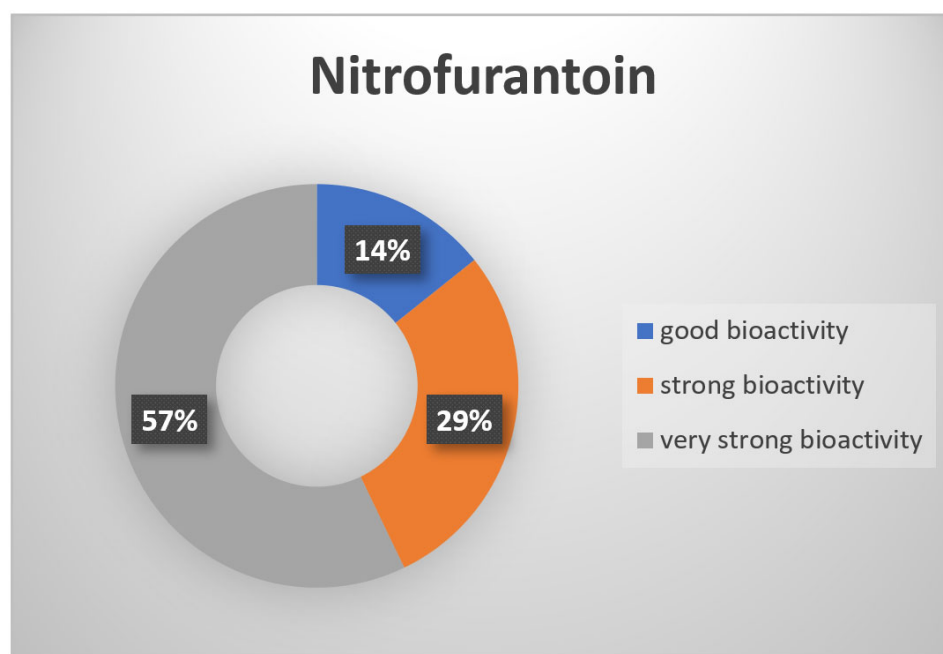

(b)

**Figure S1.** The antimicrobial activity data of the: (a) compound **29** and (b) nitrofurantoin, against tested reference Gram-positive bacterial strains. (no bioactivity – MIC >1000 µg/mL; mild bioactivity – MIC = 501–1000 µg/mL; moderate bioactivity – MIC = 126–500 µg/mL; good bioactivity – MIC = 26–125 µg/mL; strong bioactivity – MIC = 10–25 µg/mL; very strong bioactivity – MIC <10 µg/mL).

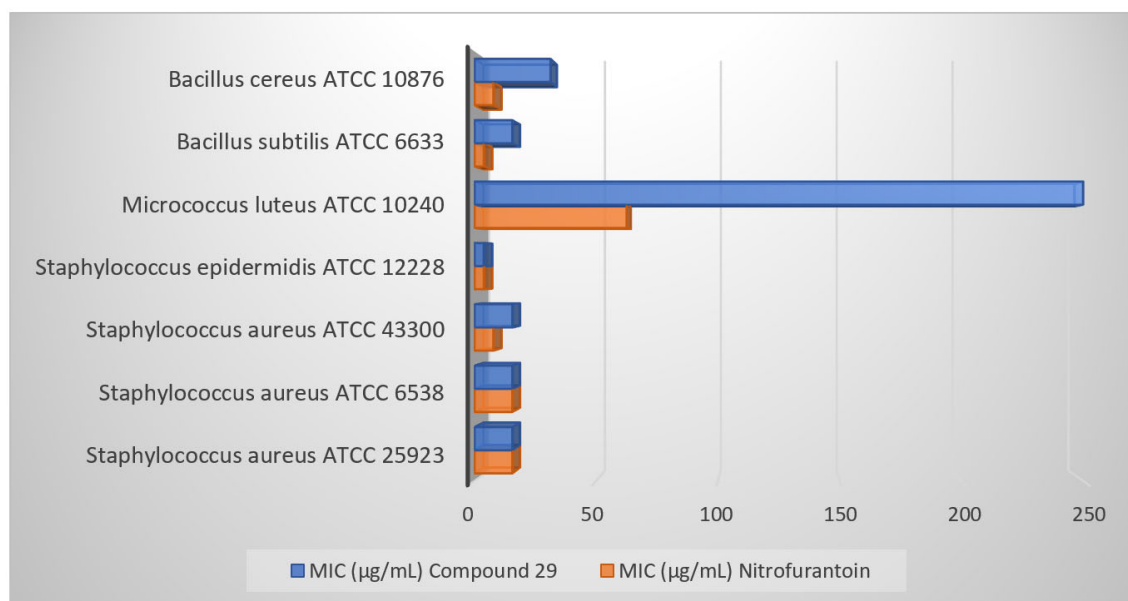

**Figure S2.** The antimicrobial activity assay results (MIC, µg/mL) for the compound **29** in comparison with nitrofurantoin against the reference Gram-positive bacterial strains.
